# Supplementary material for: Bridged filaments of histone-like nucleoid structuring protein pause RNA polymerase and aid termination in bacteria
Source: eLife journal article supplement (doi:10.7554/elife.04970), 2015-01-16
Supplement: supp [file elife_poa_e04970_Figure_3_Figure_Supplement_1.pdf › elife_poa_e04970_Figure_3_Figure_Supplement_1.pdf]

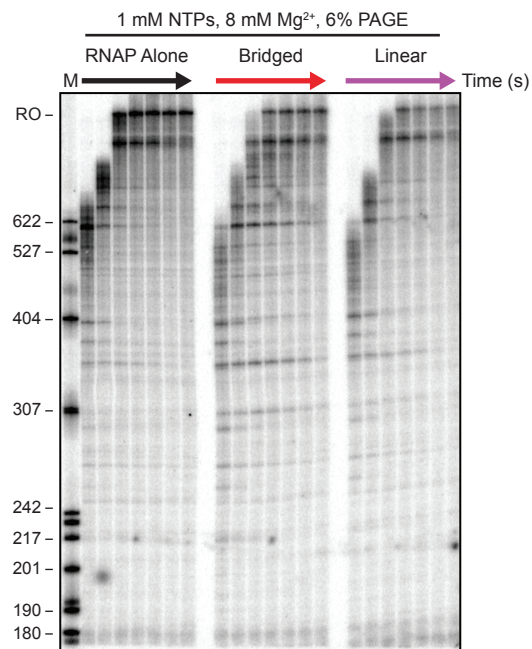

**Figure 3–Figure supplement 1. Electrophoretic gel image showing H-NS inhibited transcription elongation at physiological NTP concentrations (1 mM each NTP).**
