# Supplementary material for: Bridged filaments of histone-like nucleoid structuring protein pause RNA polymerase and aid termination in bacteria
Source: eLife journal article supplement (doi:10.7554/elife.04970), 2015-01-16
Supplement: supp [file elife_poa_e04970_Figure_6_Figure_Supplement_1.pdf › elife_poa_e04970_Figure_6_Figure_Supplement_1.pdf]

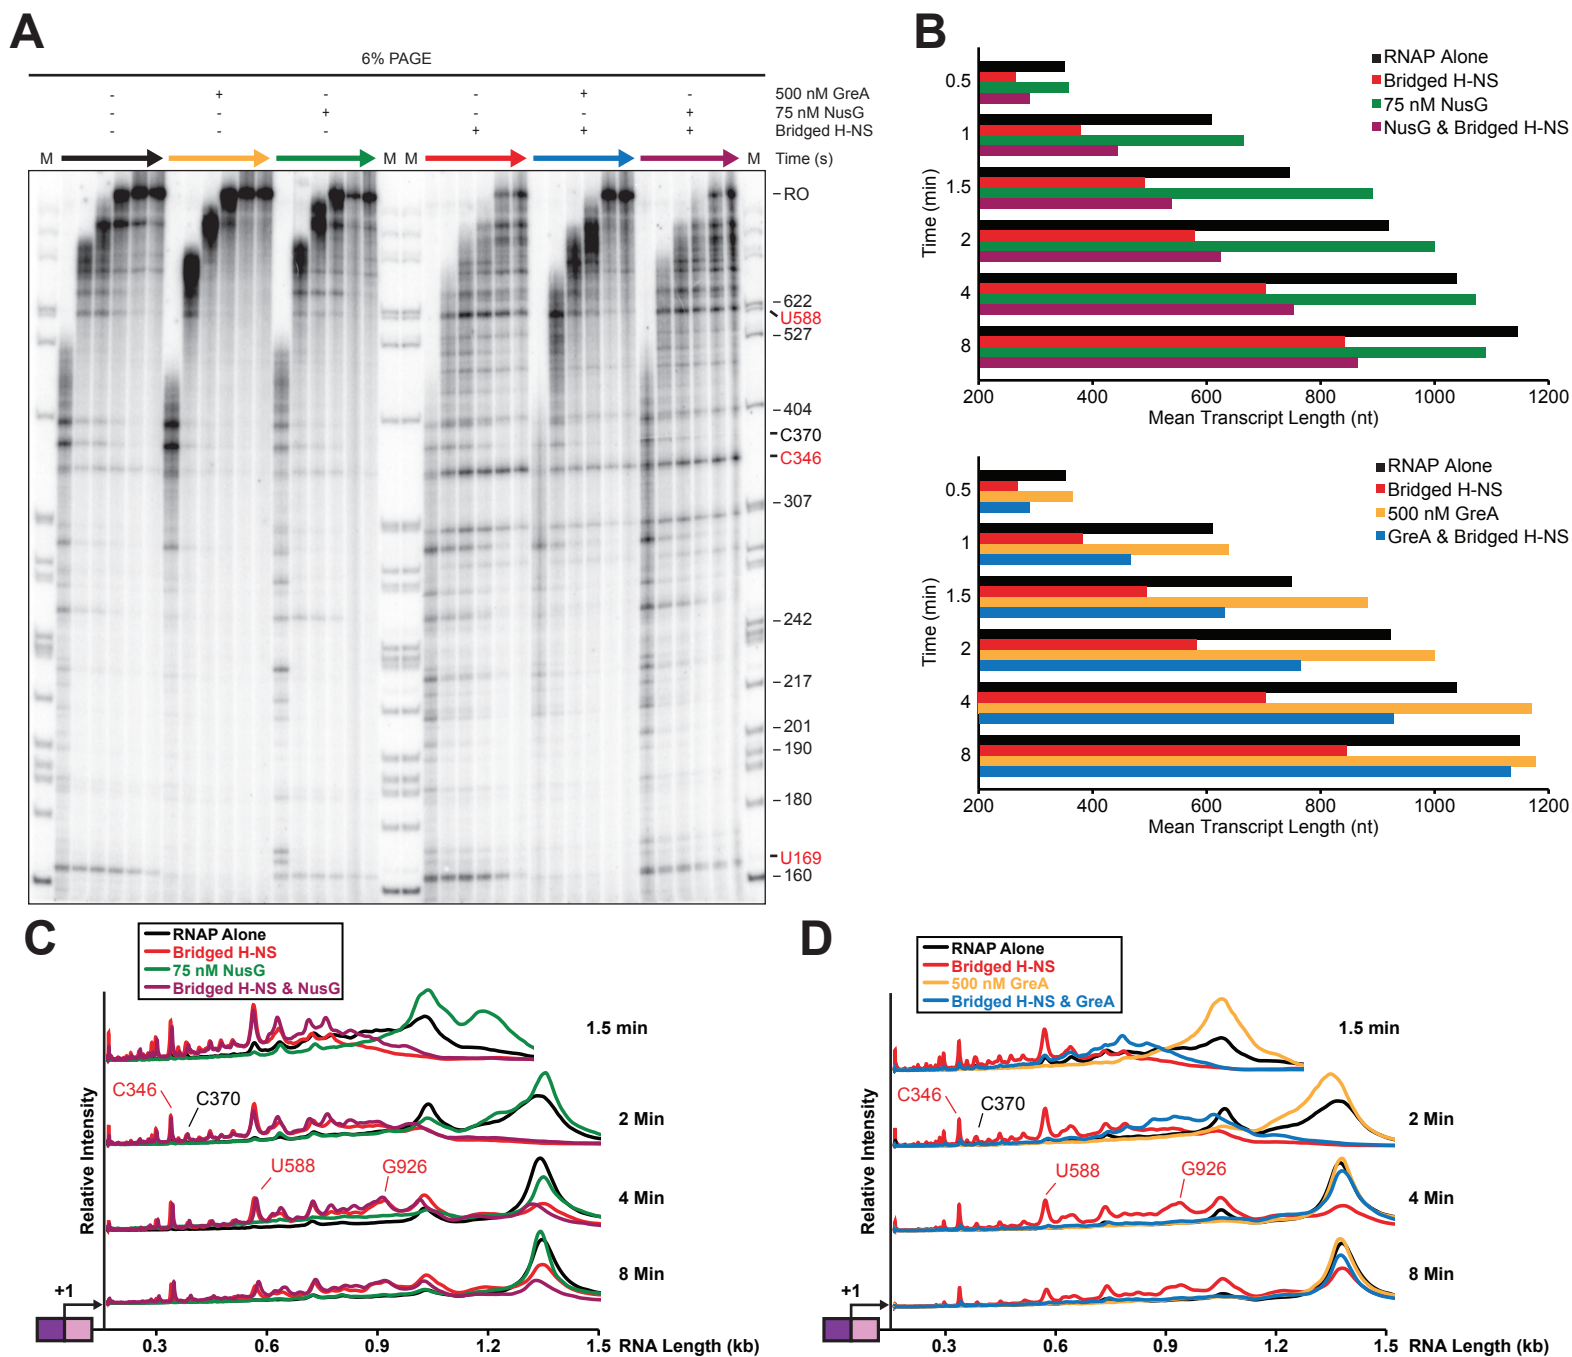

**Figure 6–Figure supplement 1. At 1 mM NTPs, NusG partially suppressed H-NS effects and GreA more significantly suppressed H-NS effects.**
