# Supplementary material for: Bridged filaments of histone-like nucleoid structuring protein pause RNA polymerase and aid termination in bacteria
Source: eLife journal article supplement (doi:10.7554/elife.04970), 2015-01-16
Supplement: supp [file elife_poa_e04970_Figure_6_Figure_Supplement_2.pdf › elife_poa_e04970_Figure_6_Figure_Supplement_2.pdf]

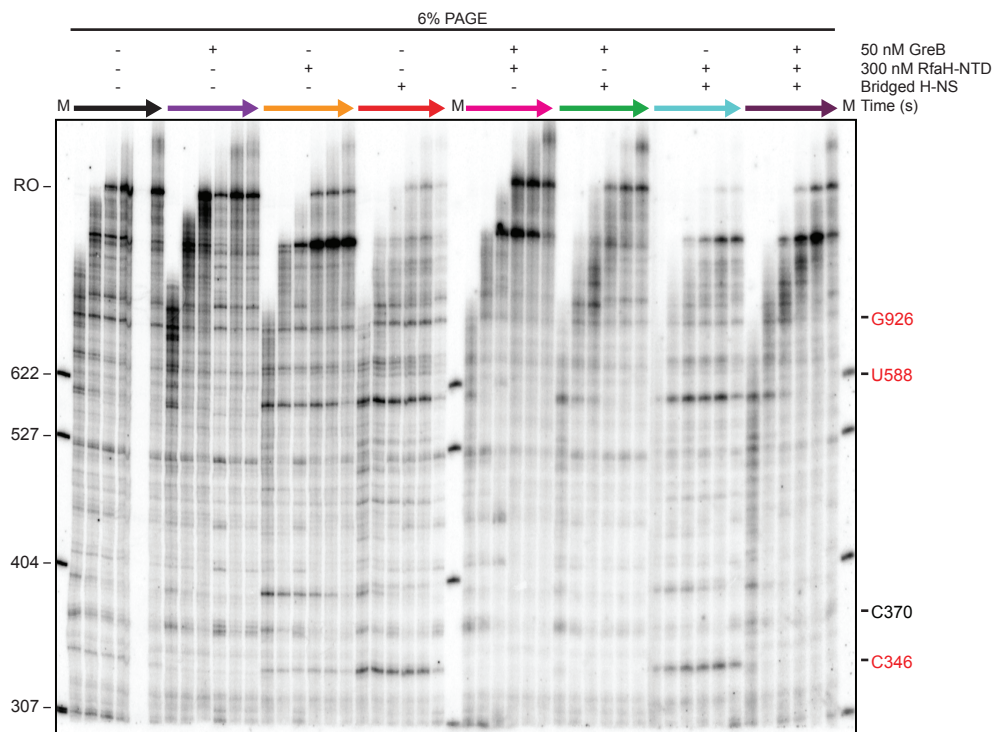

**Figure 6—Figure supplement 2. Electrophoretic gel image showing that H-NS-induced RNAP backtracking was rescued by GreB.**
