# Supplementary material for: Bridged filaments of histone-like nucleoid structuring protein pause RNA polymerase and aid termination in bacteria
Source: eLife journal article supplement (doi:10.7554/elife.04970), 2015-01-16
Supplement: supp [file elife_poa_e04970_Figure_7_Figure_Supplement_1.pdf › elife_poa_e04970_Figure_7_Figure_Supplement_1.pdf]

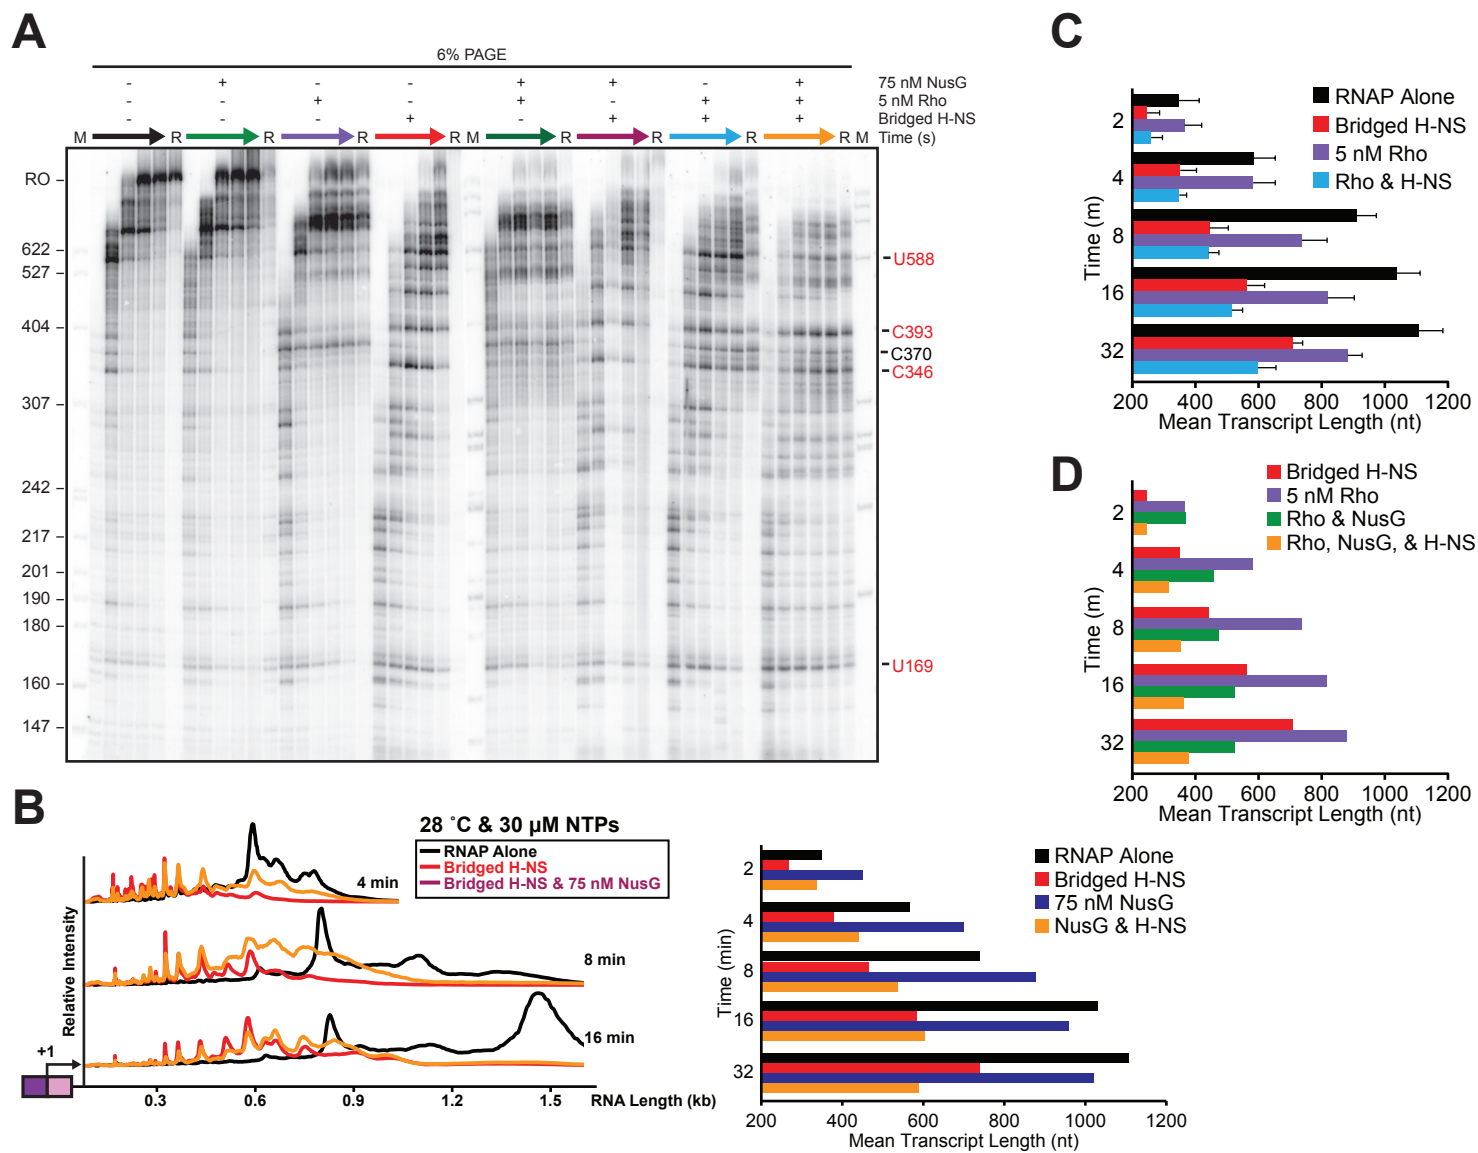

**Figure 7–Figure supplement 1. Stimulation of pausing by bridged H-NS filaments aided Rho-dependent termination.**
