# Supplementary figures and images for: Bridged filaments of histone-like nucleoid structuring protein pause RNA polymerase and aid termination in bacteria
Source: eLife journal article supplement (doi:10.7554/elife.04970), 2015-01-16

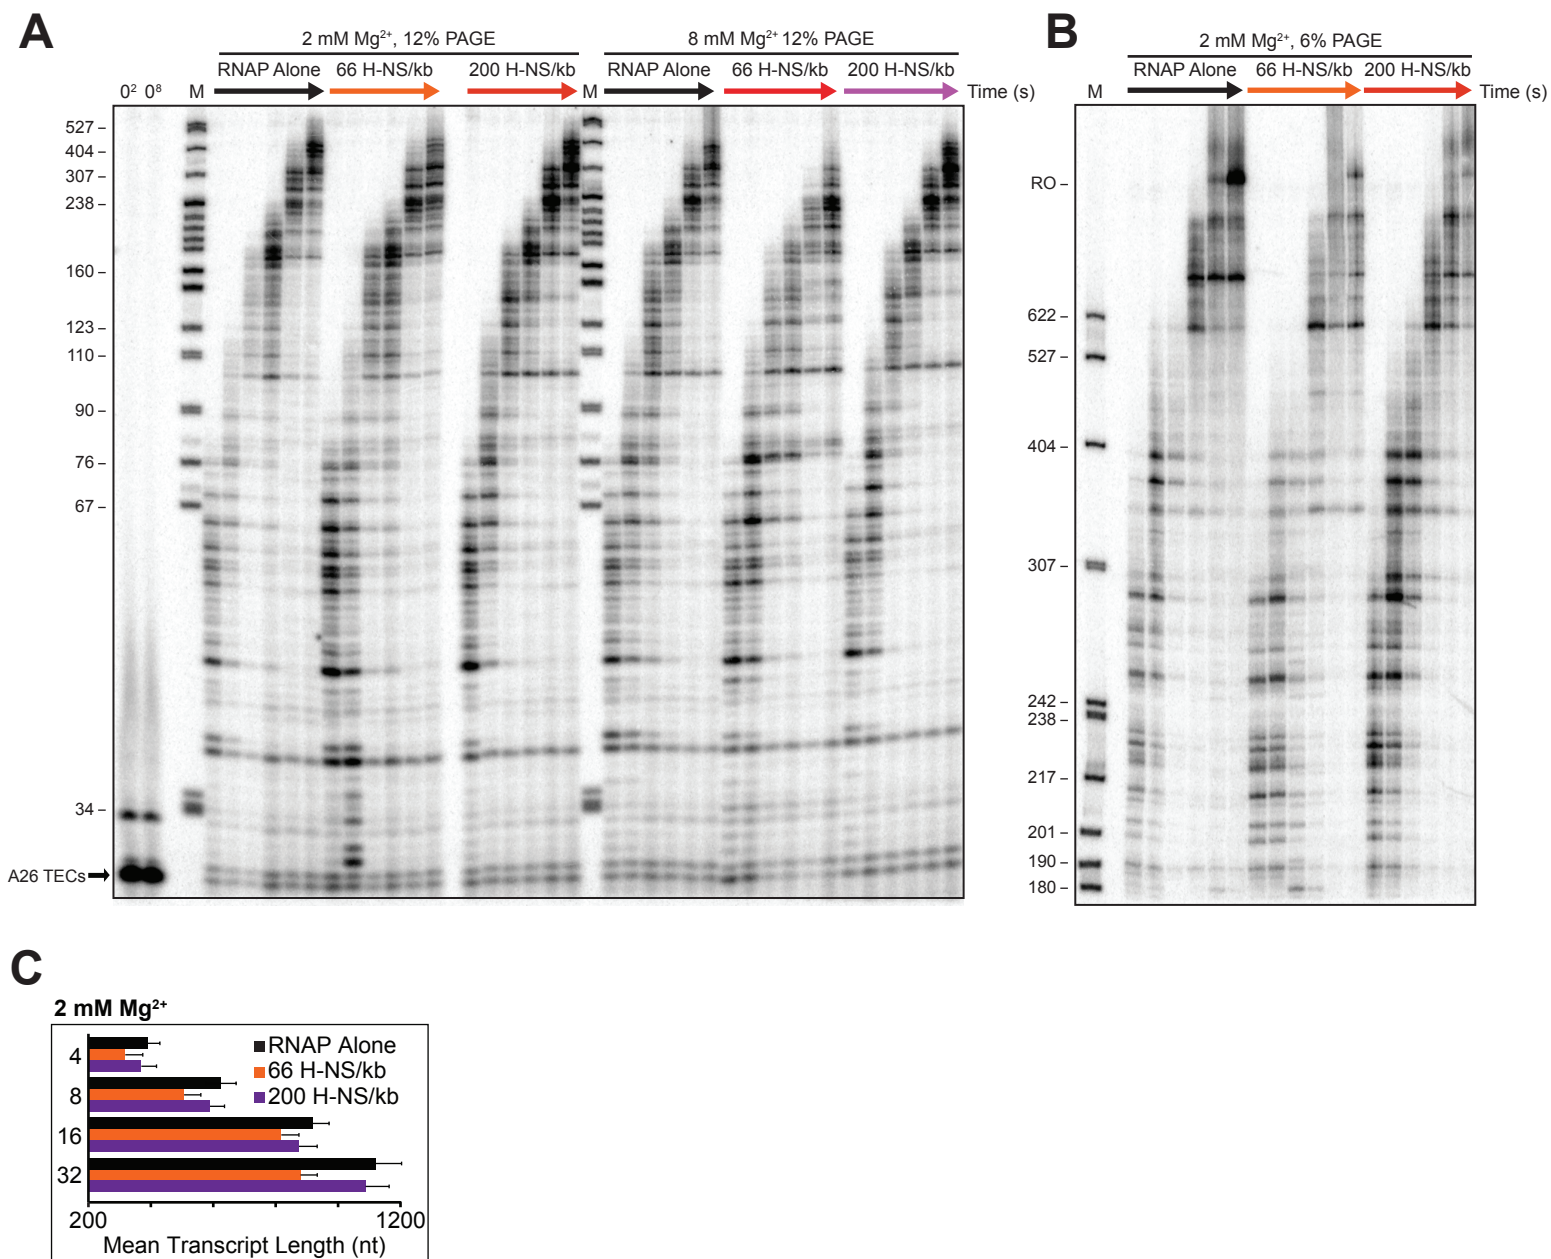

Supplement: supp [file elife_poa_e04970_FIgure_2_Figure_Supplement_2.pdf › elife_poa_e04970_FIgure_2_Figure_Supplement_2.pdf]

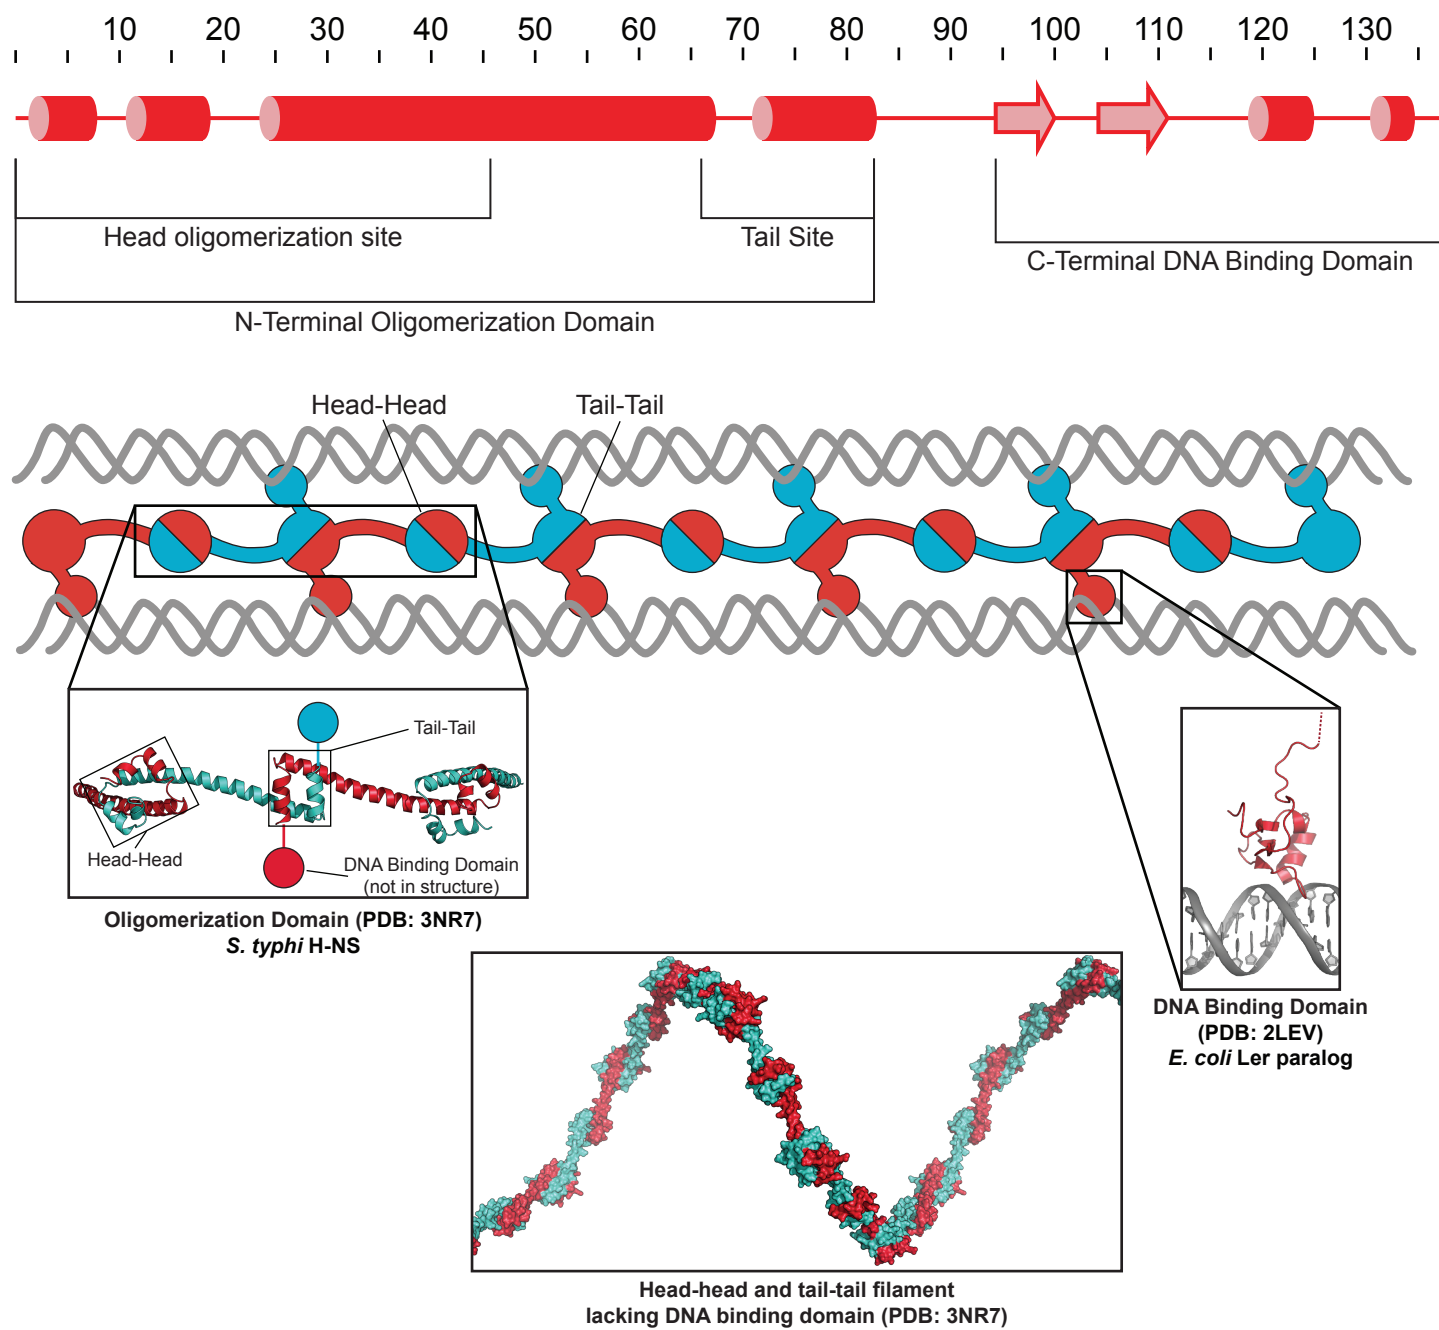

**Figure 1–Figure supplement 1. Model of H-NS filaments.**

Supplement: supp [file elife_poa_e04970_Figure_1_Figure_Supplement_1.pdf › elife_poa_e04970_Figure_1_Figure_Supplement_1.pdf]

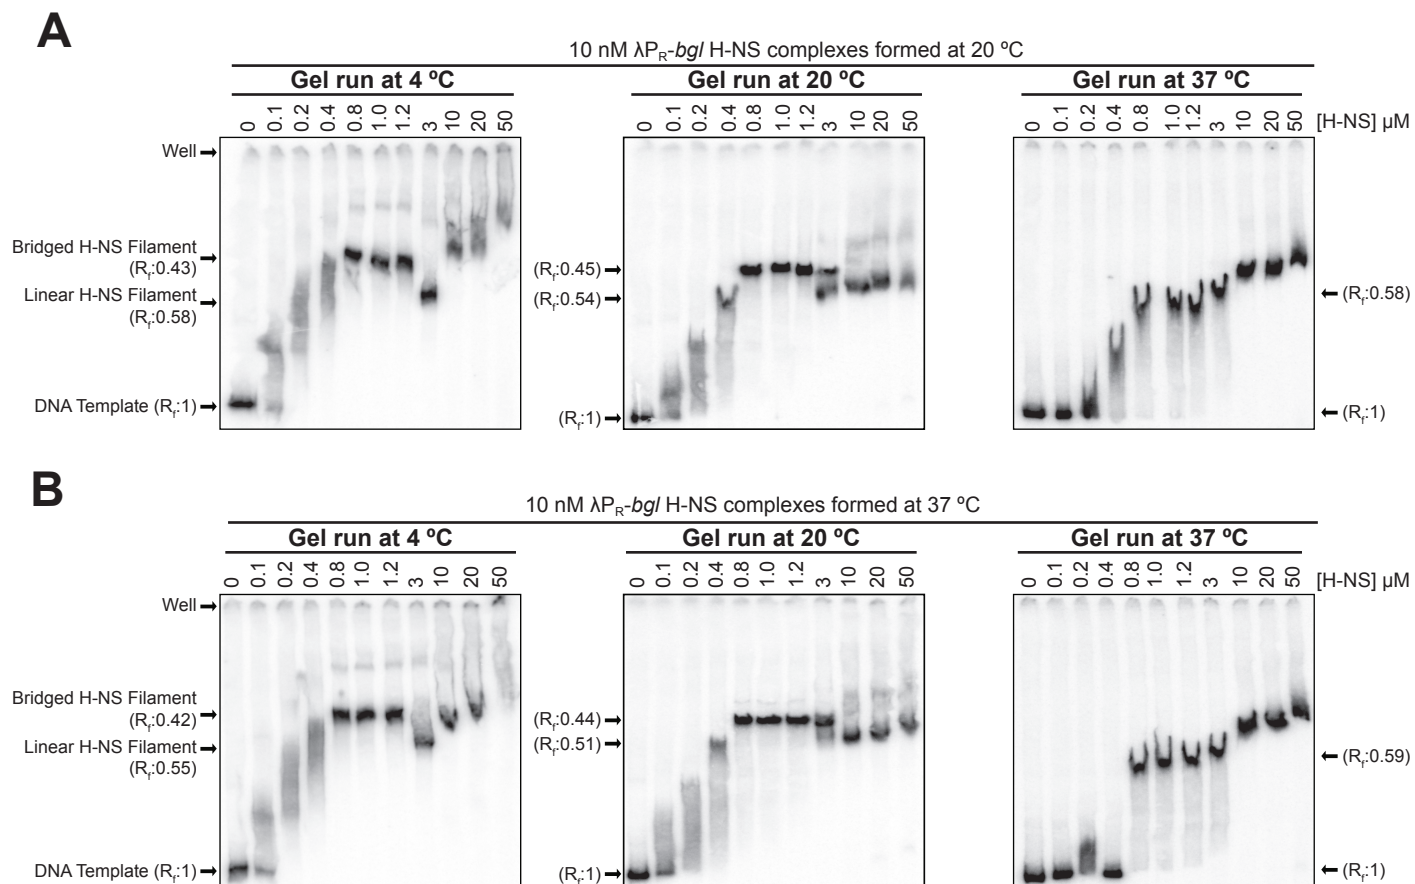

**Figure 1–Figure supplement 3. Temperature affected H-NS bridging interactions.**

Supplement: supp [file elife_poa_e04970_Figure_1_Figure_Supplement_3.pdf › elife_poa_e04970_Figure_1_Figure_Supplement_3.pdf]

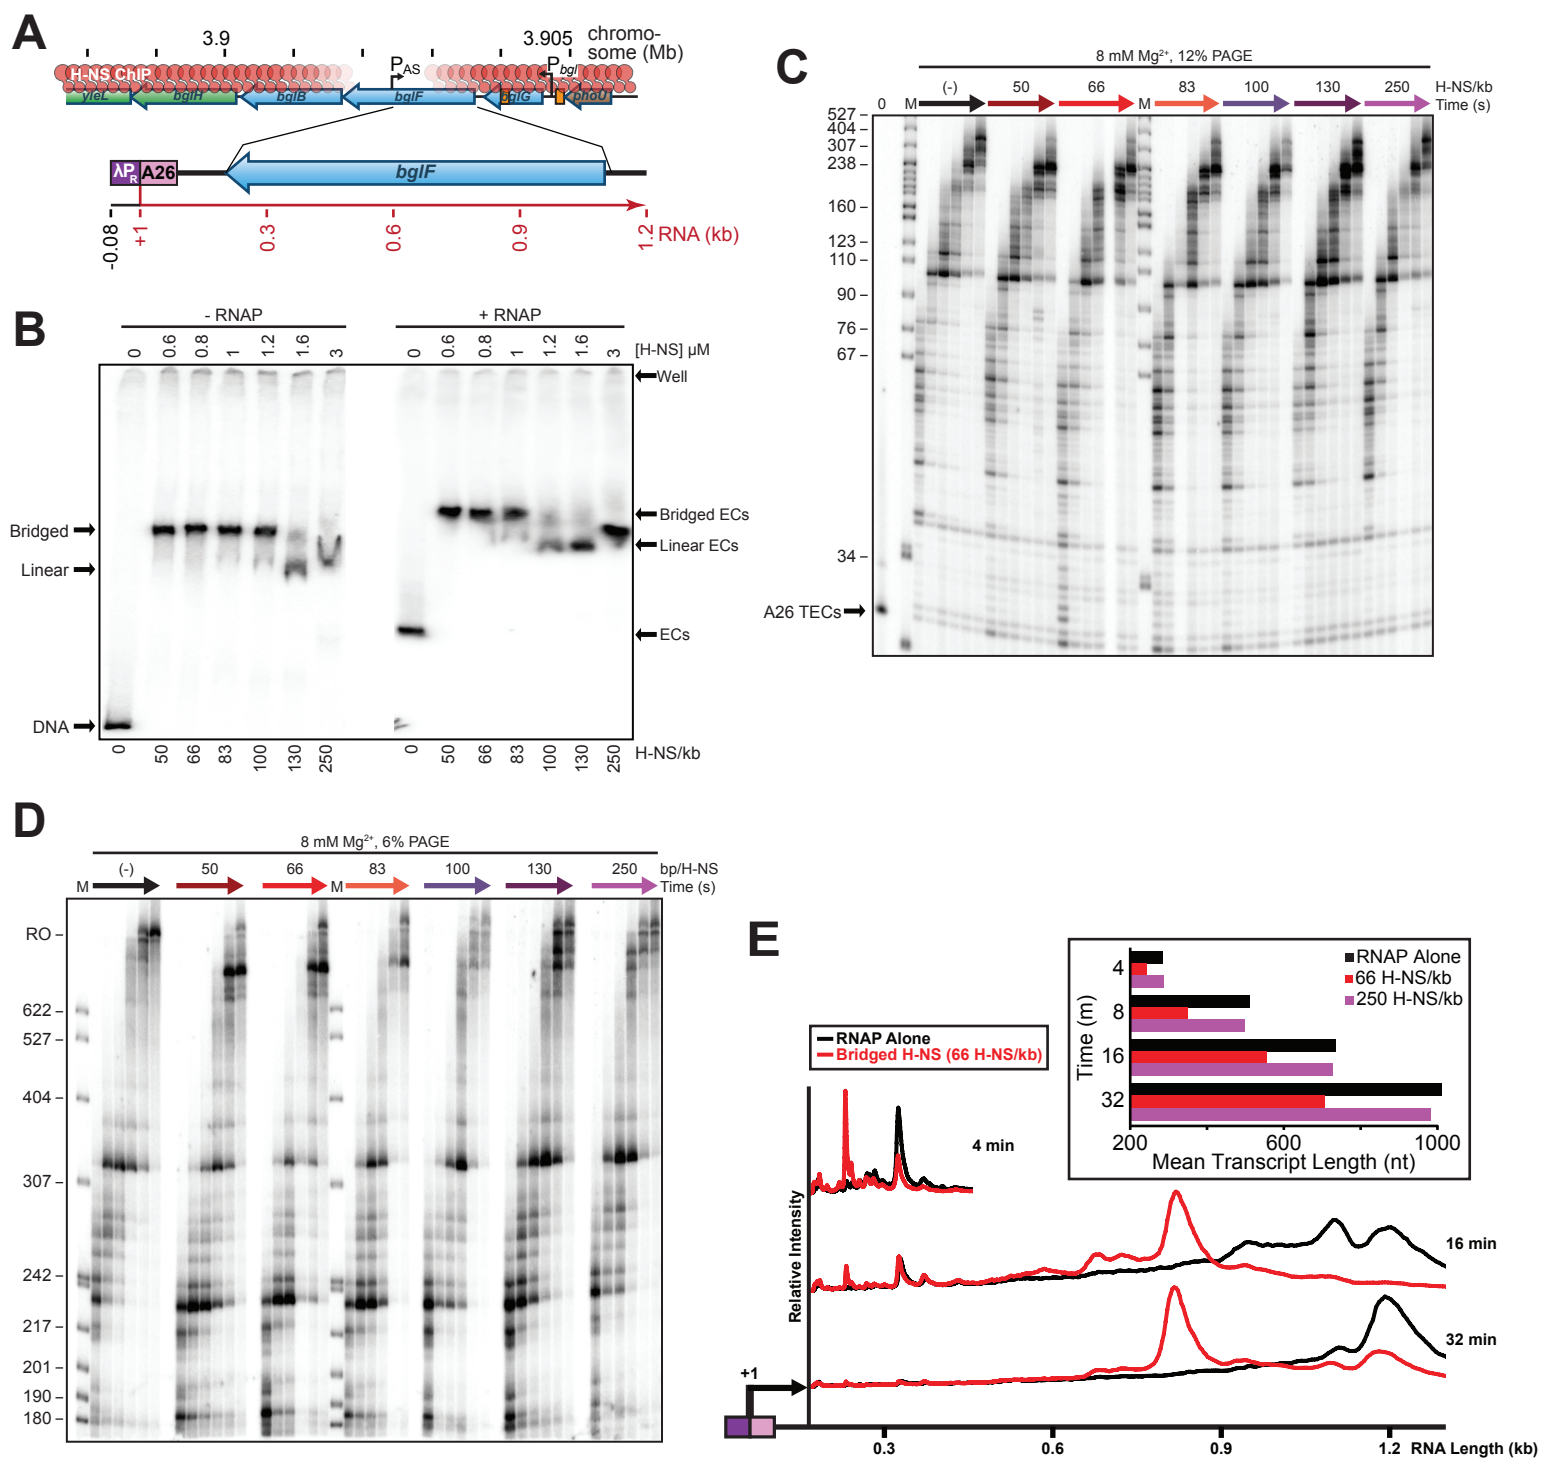

Supplement: supp [file elife_poa_e04970_Figure_2_FIgure_Supplement_3.pdf › elife_poa_e04970_Figure_2_FIgure_Supplement_3.pdf]

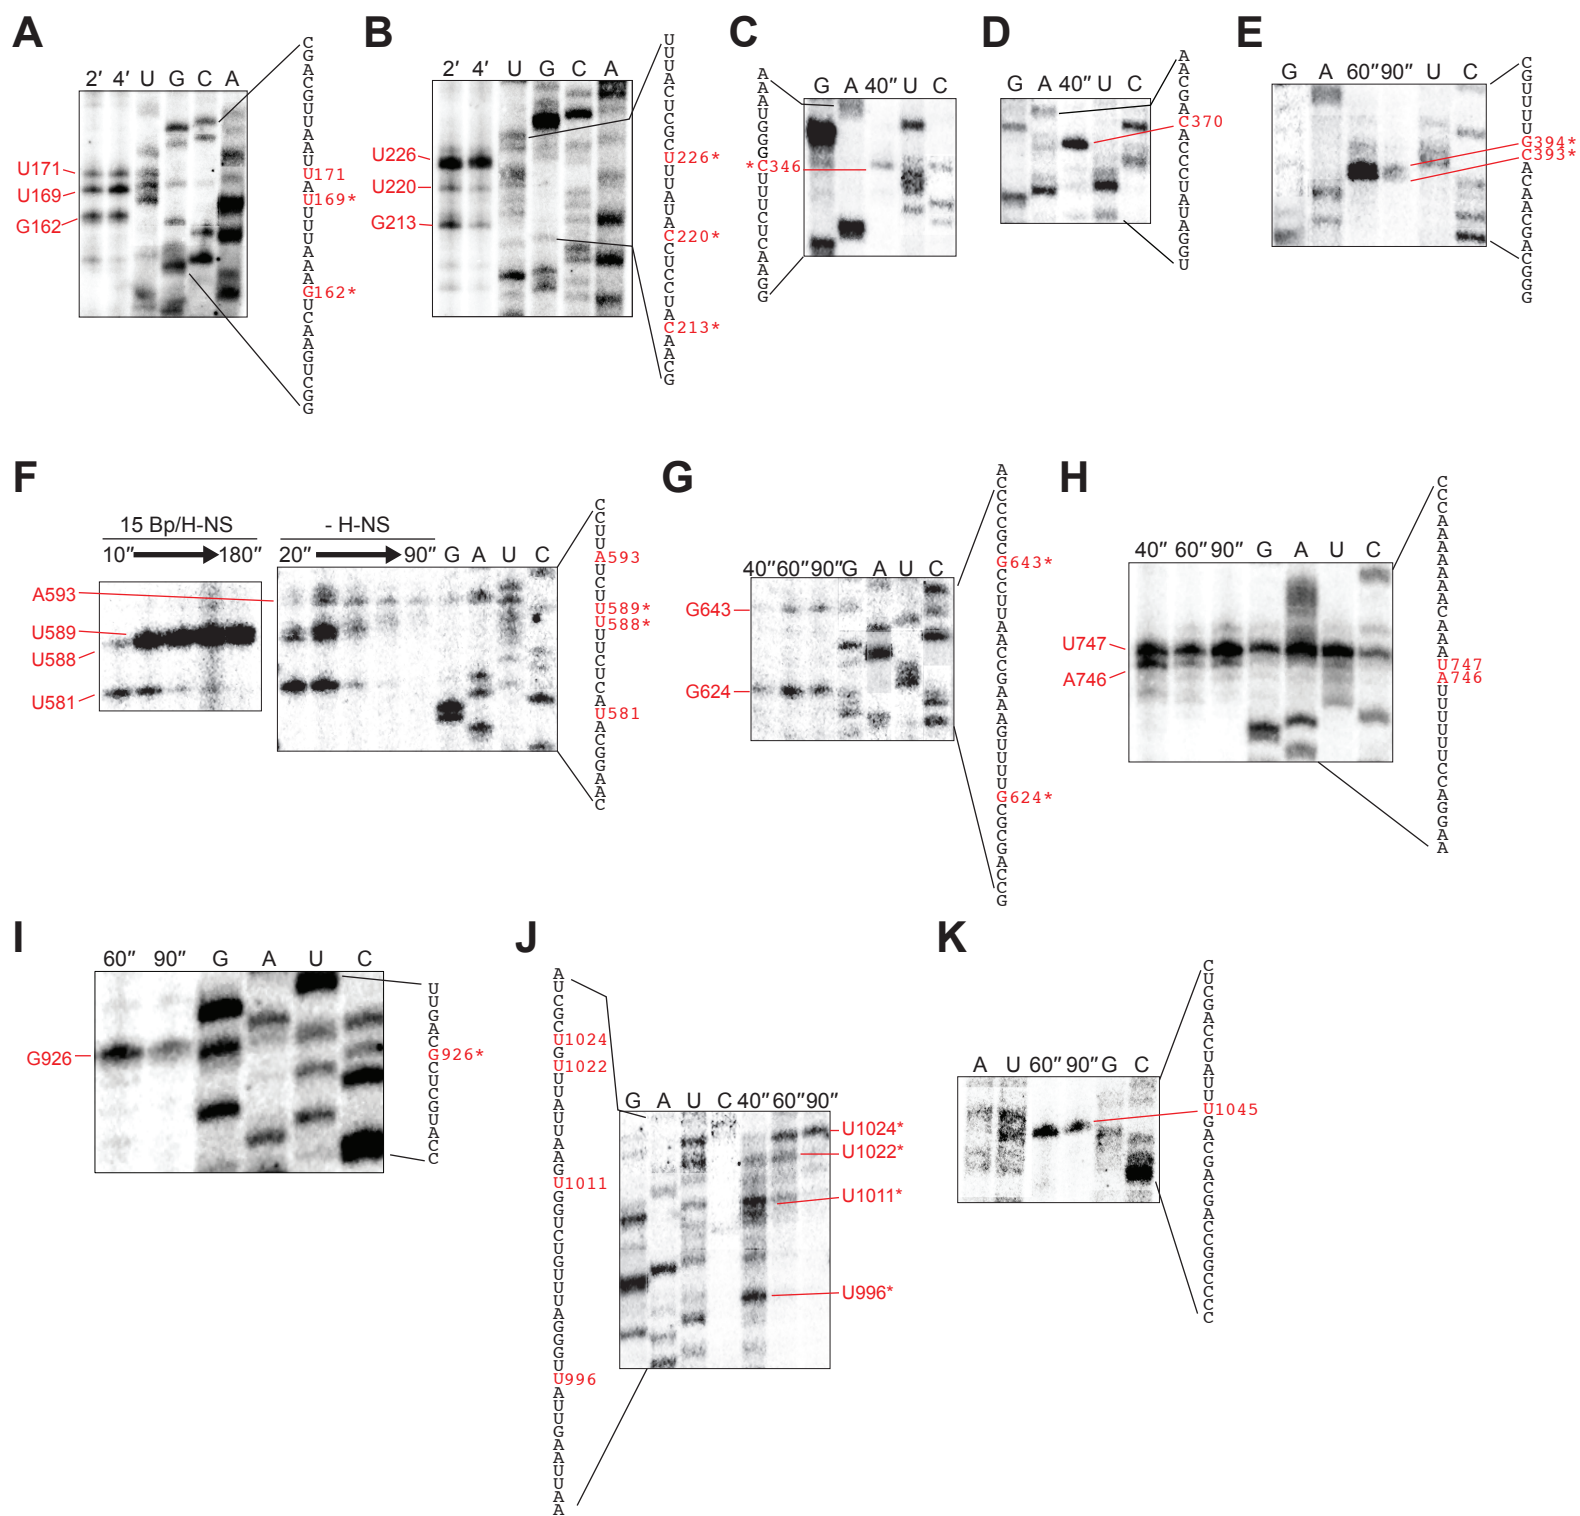

Figure 2–Figure supplement 1. Mapping pause RNA 3' ends from the  $\Delta P_R$ -*bgl* template.

Supplement: supp [file elife_poa_e04970_Figure_2_Figure_Supplement_1.pdf › elife_poa_e04970_Figure_2_Figure_Supplement_1.pdf]

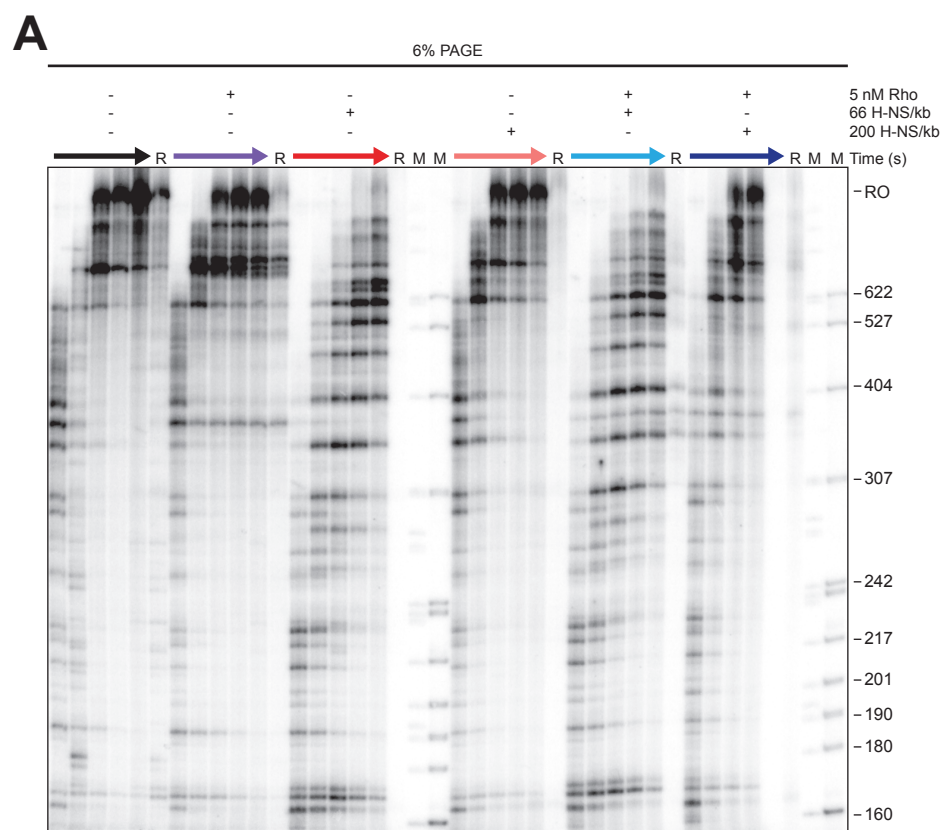

**Figure 8–Figure supplement 1. Linear H-NS Filaments did not aid in Rho termination.**

Supplement: supp [file elife_poa_e04970_Figure_8_Figure_Supplement_1.pdf › elife_poa_e04970_Figure_8_Figure_Supplement_1.pdf]
